# Supplementary material for: Lipid Nanoparticles Loading Steroidal Alkaloids of Tomatoes Affect Neuroblastoma Cell Viability in an In Vitro Model
Source: MDPI journal article supplement (doi:10.3390/pharmaceutics15112573), 2023-11-02
Supplement: s1 [file s1]

## Supporting Informations

### Formulation and characterization of lipid nanocarriers encapsulating steroidal alkaloids of tomato and evaluation of potential anticancer activity in an in vitro model

Contents:

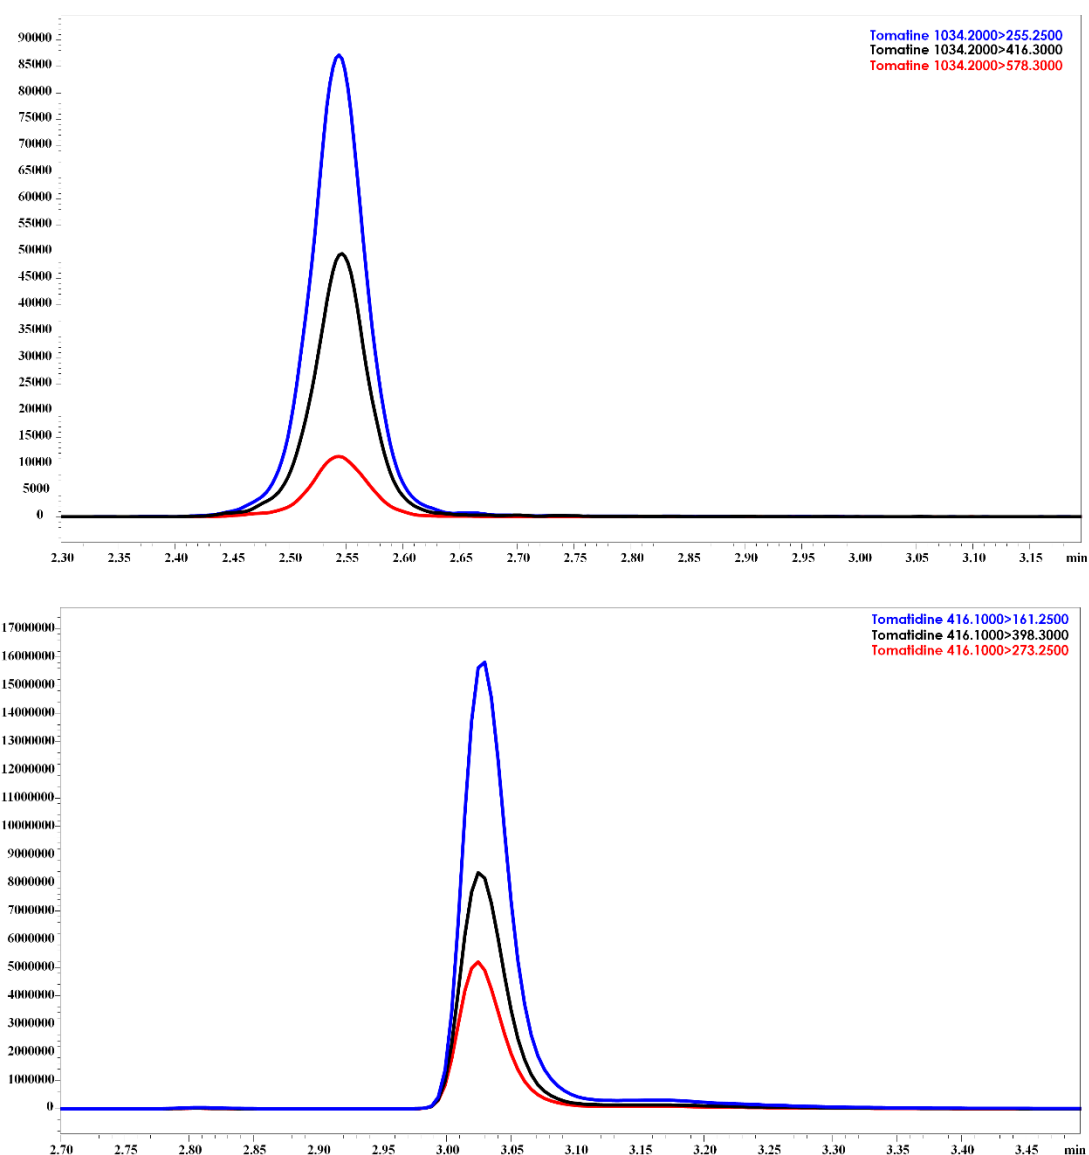

Figure SX1. MRM transition of  $\alpha$ -Tomatine (up) and Tomatidine (down).

37  
38  
39  
40

**Table S1.** Method validation parameters for quantitation of  $\alpha$ -TM and TD.

| Parameters                                                                                                                                                                                                                                                                                      | Tomatine            |                   | Tomatidine          |                   |
|-------------------------------------------------------------------------------------------------------------------------------------------------------------------------------------------------------------------------------------------------------------------------------------------------|---------------------|-------------------|---------------------|-------------------|
| Intercept                                                                                                                                                                                                                                                                                       | 12.794              |                   | 0.1429              |                   |
| Slope                                                                                                                                                                                                                                                                                           | 7.0E-04             |                   | 1.10E-06            |                   |
| Correlation coefficient (R <sup>2</sup> )                                                                                                                                                                                                                                                       | ≥ 0.9994            |                   | ≥ 0.9995            |                   |
| LOD (ng mL <sup>-1</sup> )                                                                                                                                                                                                                                                                      | 2.53                |                   | 0.11                |                   |
| LOQ (ng mL <sup>-1</sup> )                                                                                                                                                                                                                                                                      | 0.83                |                   | 0.36                |                   |
| Intraday (n = 3)                                                                                                                                                                                                                                                                                | Precision<br>(RSD%) | Accuracy<br>(Er%) | Precision<br>(RSD%) | Accuracy<br>(Er%) |
| LQC                                                                                                                                                                                                                                                                                             | 2.7                 | 94.3              | 2.1                 | 102.7             |
| MQC                                                                                                                                                                                                                                                                                             | 0.3                 | 93.5              | 0.2                 | 92.9              |
| HQC                                                                                                                                                                                                                                                                                             | 1.1                 | 100.4             | 1.1                 | 93.8              |
| Interday (n = 3)                                                                                                                                                                                                                                                                                | Precision<br>(RSD%) | Accuracy<br>(Er%) | Precision<br>(RSD%) | Accuracy<br>(Er%) |
| LQC                                                                                                                                                                                                                                                                                             | 1.8                 | 100.9             | 0.6                 | 99.3              |
| MQC                                                                                                                                                                                                                                                                                             | 0.2                 | 96.4              | 2.0                 | 98.7              |
| HQC                                                                                                                                                                                                                                                                                             | 0.8                 | 94.7              | 0.6                 | 97.3              |
| LOD: $3.3 \times$ (standard deviation of the response/slope of calibration curve); LOQ: $10 \times$ (standard deviation of the response/slope of calibration curve); RSD, relative standard deviation ( $SD \times 100/\text{Mean}$ ); Low (LQC), Medium (MQC) and High (HQC) Quality Controls. |                     |                   |                     |                   |

41
